# Supplementary material
Source: publisher figshare collection journal article supplement (https://frontiersin.figshare.com/ndownloader/files/22024425)
Supplement: Supplementary file [file 22024425]

## Supplementary Material

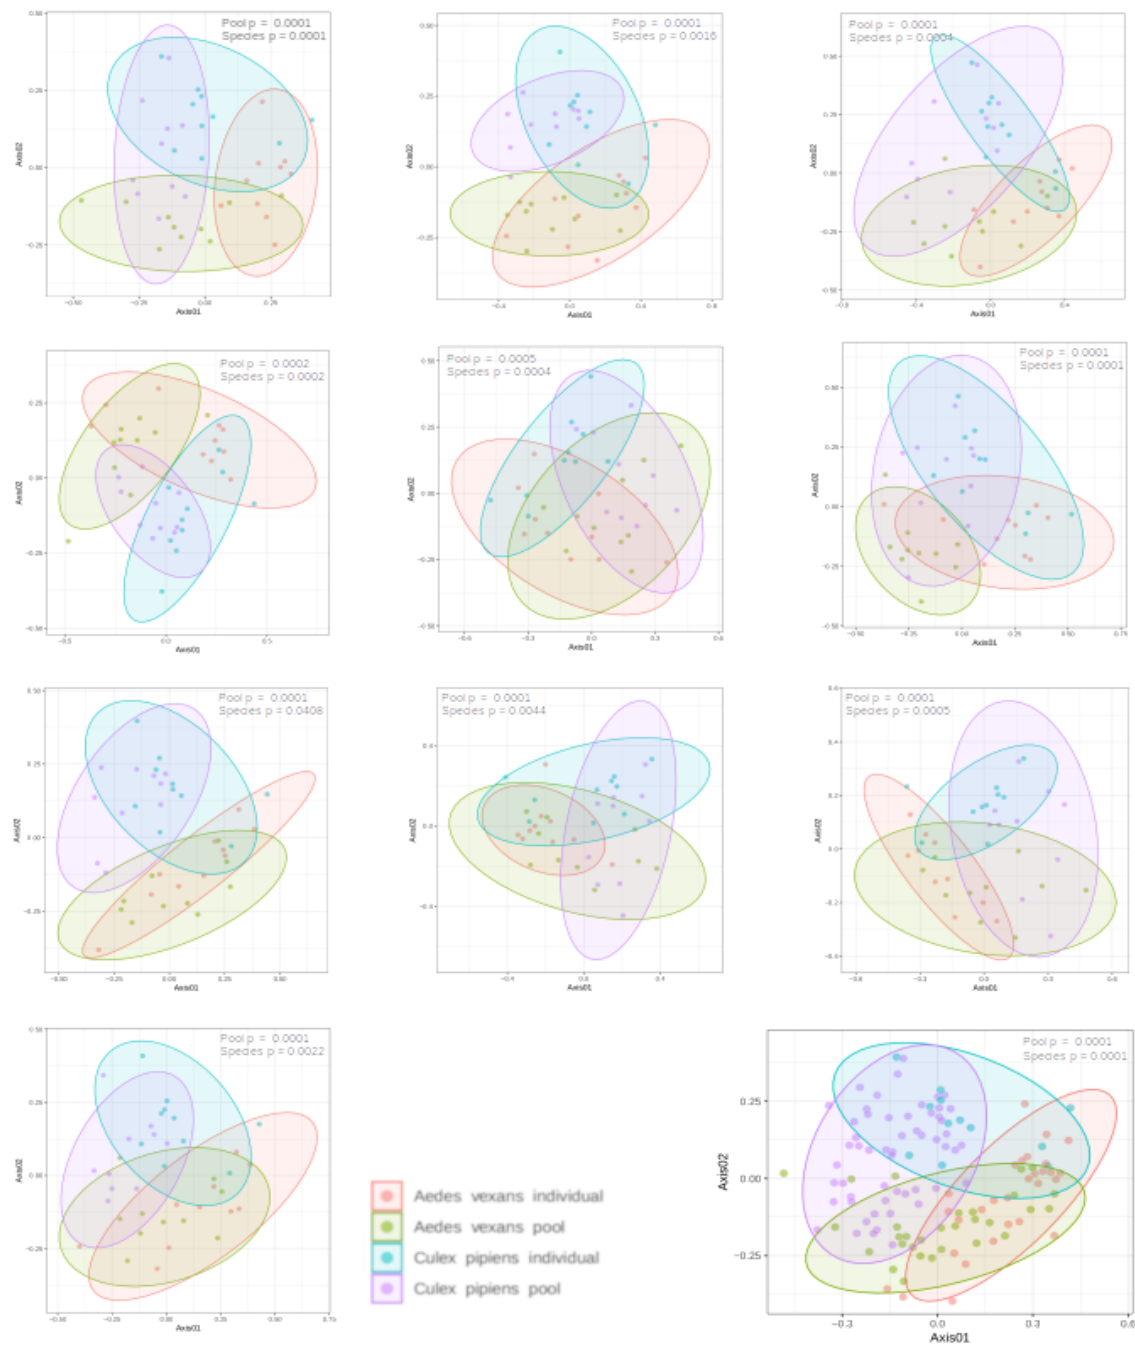

**Supplementary Figure 3.** NMDS showing the beta-diversity of *Aedes vexans* and *Culex pipiens* microbiomes both from individuals and pools, using 10 randomly sub-sampled data sets ( $n = 10$  for each group). Confidence ellipses are shown for each group. The results for the full data set presented in the main text are also shown at the bottom-right of the figure for easier comparison.
